# Supplementary material for: Carnosine scavenging of glucolipotoxic free radicals enhances insulin secretion and glucose uptake
Source: PubMed Central journal article supplement (PMC5645413; doi:10.1038/s41598-017-13649-w), 2017-10-17
Supplement: 41598_2017_13649_MOESM1_ESM.pdf [file 41598_2017_13649_MOESM1_ESM.pdf]

# **Carnosine scavenging of glucolipotoxic free radicals enhances insulin secretion and glucose uptake.**

Michael J. Cripps<sup>1</sup>, Katie Hanna<sup>1</sup>, Charlie Lavilla<sup>1</sup>, Sophie R. Sayers<sup>2</sup>, Paul W. Caton<sup>2</sup>, Craig Sims<sup>1</sup>, Luigi De Girolamo<sup>1</sup>, Craig Sale<sup>3</sup>, and Mark D. Turner<sup>1</sup>.

<sup>1</sup>Interdisciplinary Biomedical Research Centre, School of Science and Technology, Nottingham Trent University, Clifton, Nottingham, NG11 8NS, UK.. <sup>2</sup>Diabetes and Nutritional Sciences Division, King's College London, London, United Kingdom, SE1 1UL, <sup>3</sup>Sport, Health and Performance Enhancement (SHAPE) Research Centre, School of Science and Technology, Nottingham Trent University, Clifton, Nottingham, NG11 8NS, UK..

\*Correspondence to:

Dr. Mark D. Turner,  
Interdisciplinary Biomedical Research Centre.  
School of Science and Technology,  
Nottingham Trent University,  
Clifton Road,  
Nottingham, NG11 8NS  
United Kingdom.

E-mail: [mark.turner@ntu.ac.uk](mailto:mark.turner@ntu.ac.uk)

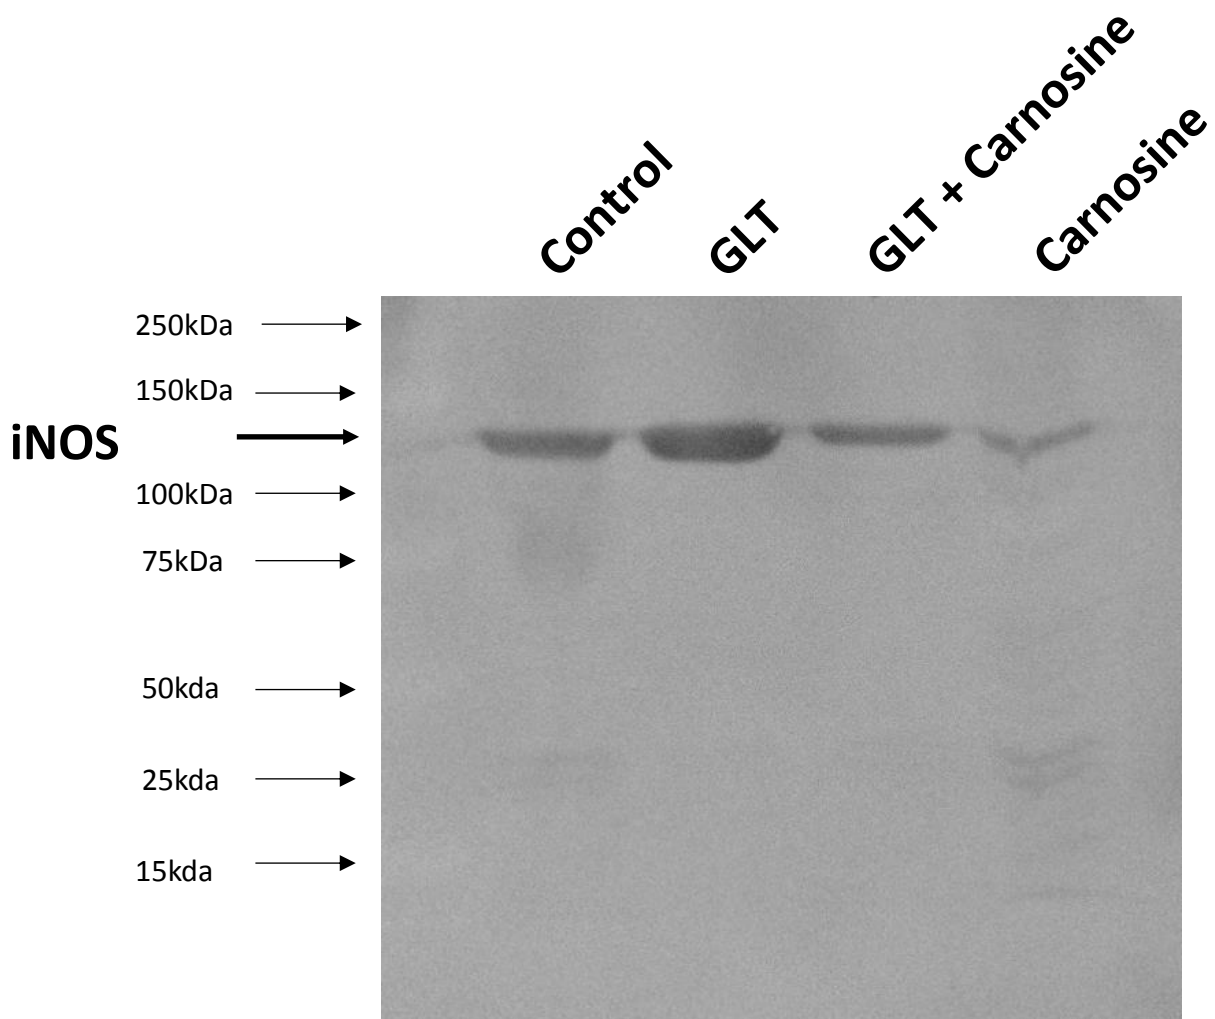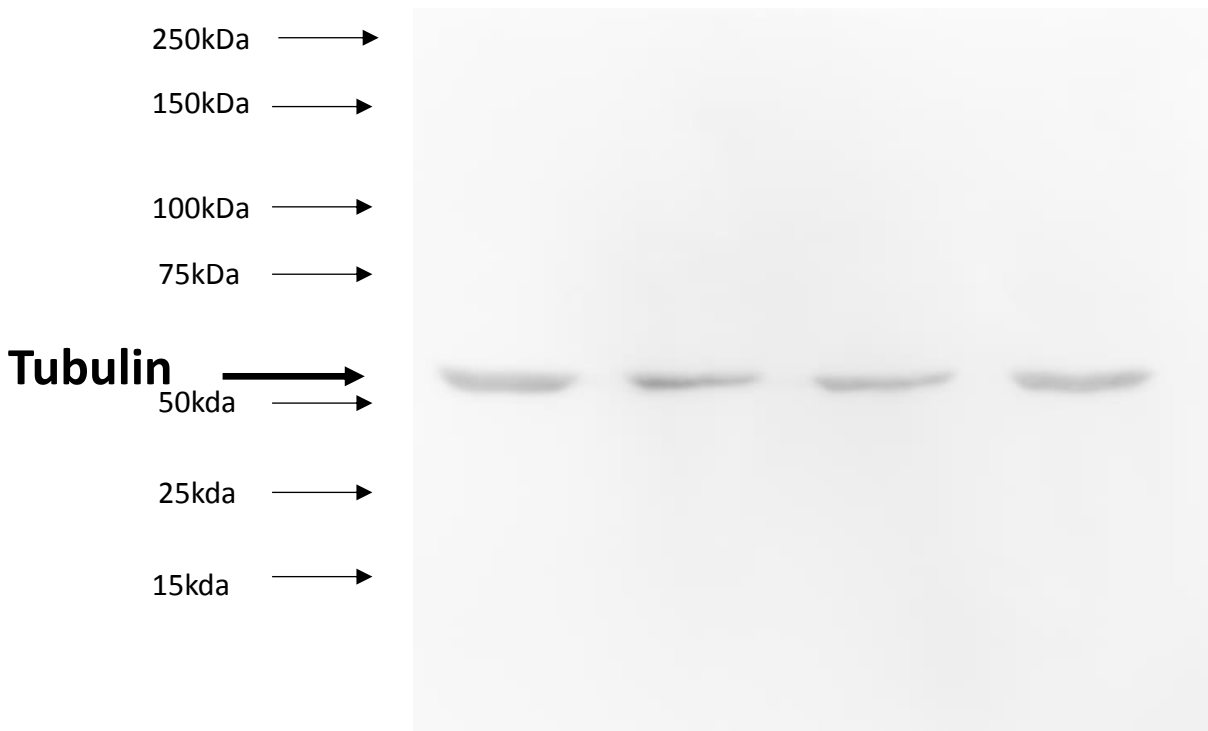

### **Supplementary Figure 1**

INS -1 cells were cultured in RPMI-1640 media, or RPMI GLT media for 5 days  $\pm$  10mM carnosine. Protein was separated by SDS-PAGE, transferred to nitrocellulose, and specific proteins detected using either anti-iNOS or anti-tubulin primary antibody.
